# Supplementary material
Source: HighWire-hosted journal article supplement (https://www.cmajopen.ca/highwire/filestream/81161/field_highwire_adjunct_files/0/2017-0123-1-at.pdf)

## Appendix 1 (as supplied by the authors): Sampling strategy

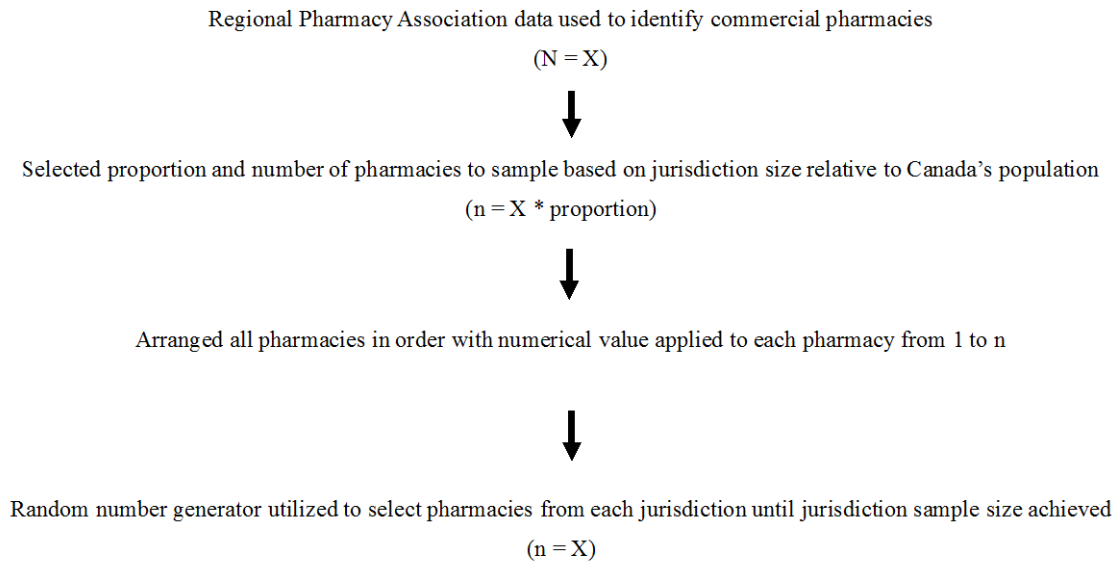

Supplement: 2017-0123-1-at.pdf [file 2017-0123-1-at.pdf]
